# Supplementary material for: Nanogels of a Succinylated Glycol Chitosan-Succinyl Prednisolone Conjugate: Release Behavior, Gastrointestinal Distribution, and Systemic Absorption
Source: MDPI journal article supplement (doi:10.3390/ijms21072376), 2020-03-30
Supplement: s1 [file s1]

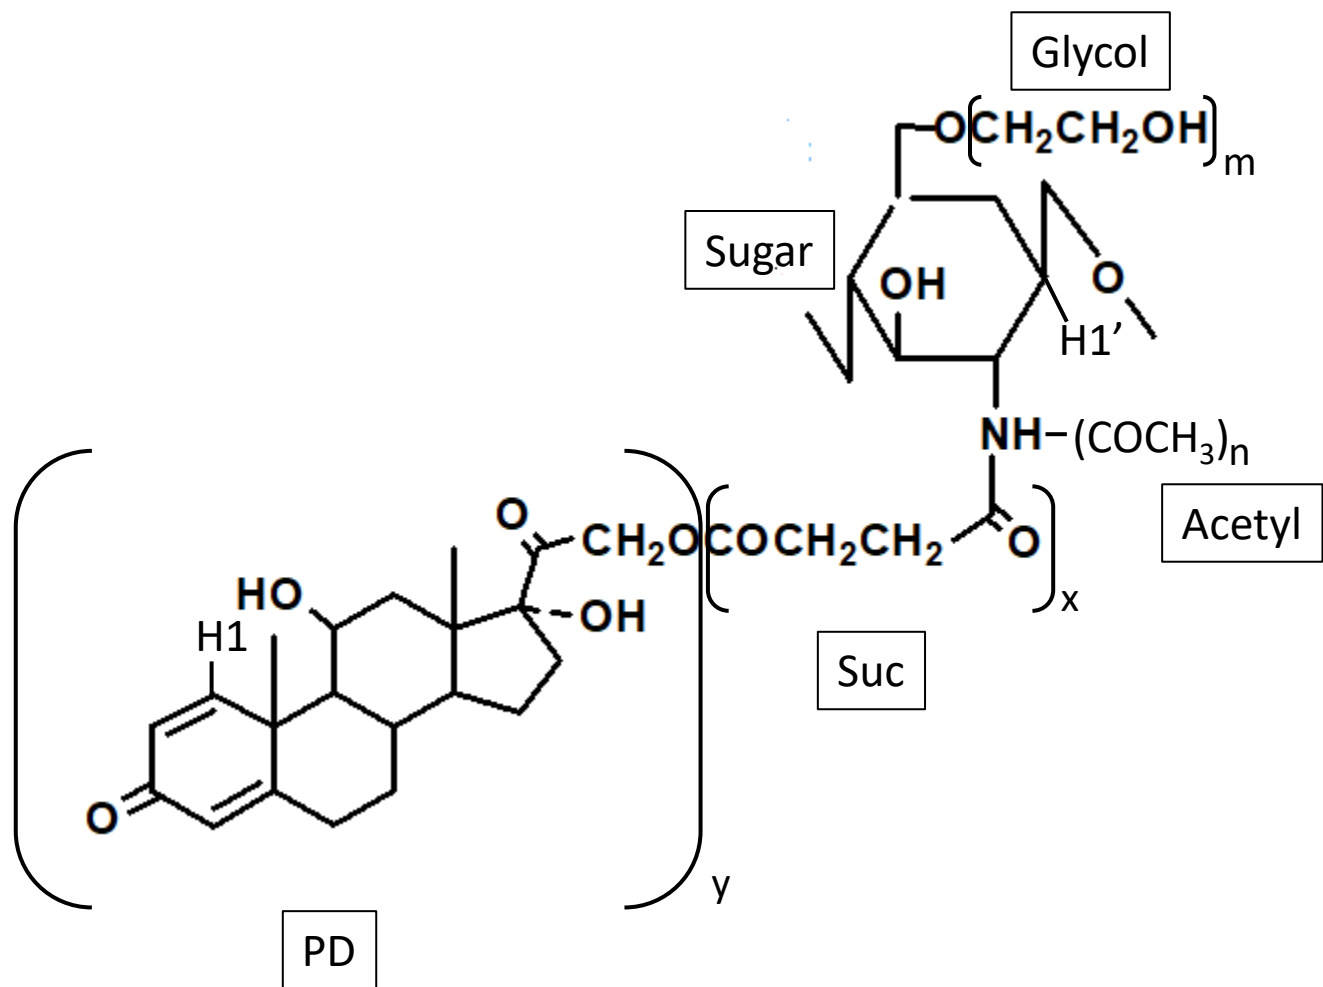

**Supplementary file 1. Proposed structure of S-S-GCh-SP for composition analysis from  $^1\text{H}$ -NMR.**

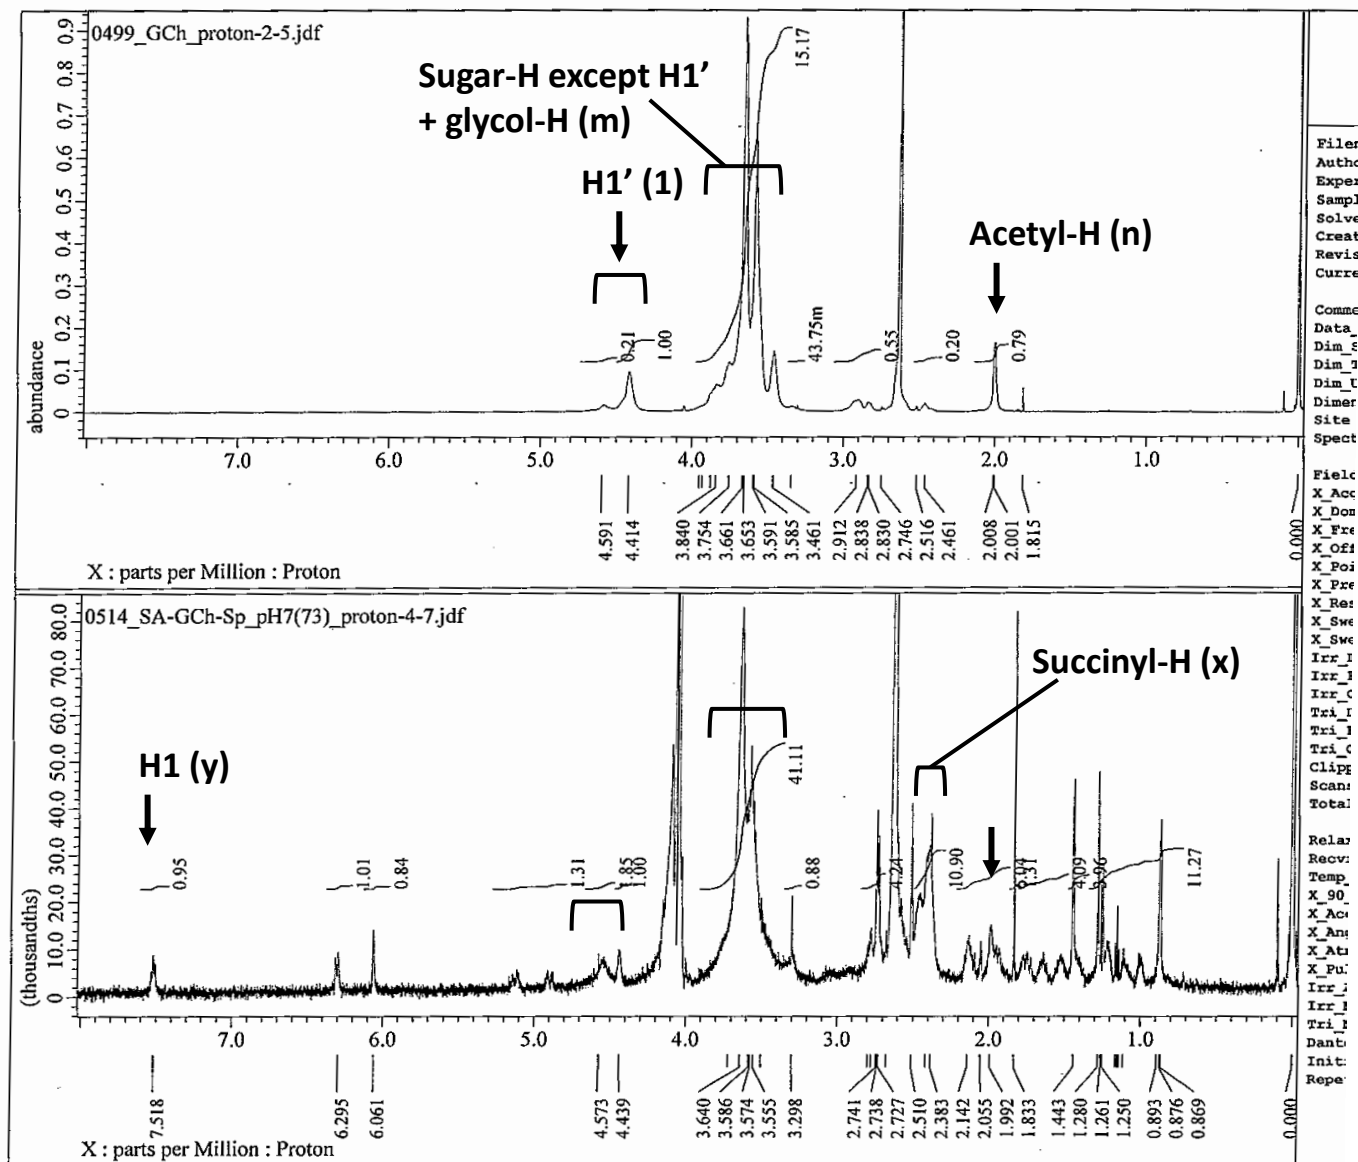

**Supplementary file 2. Assignment of each proton of S-GCh-SP. The character or number in the charts shows a molar number in the structure in supplementary file 1.**

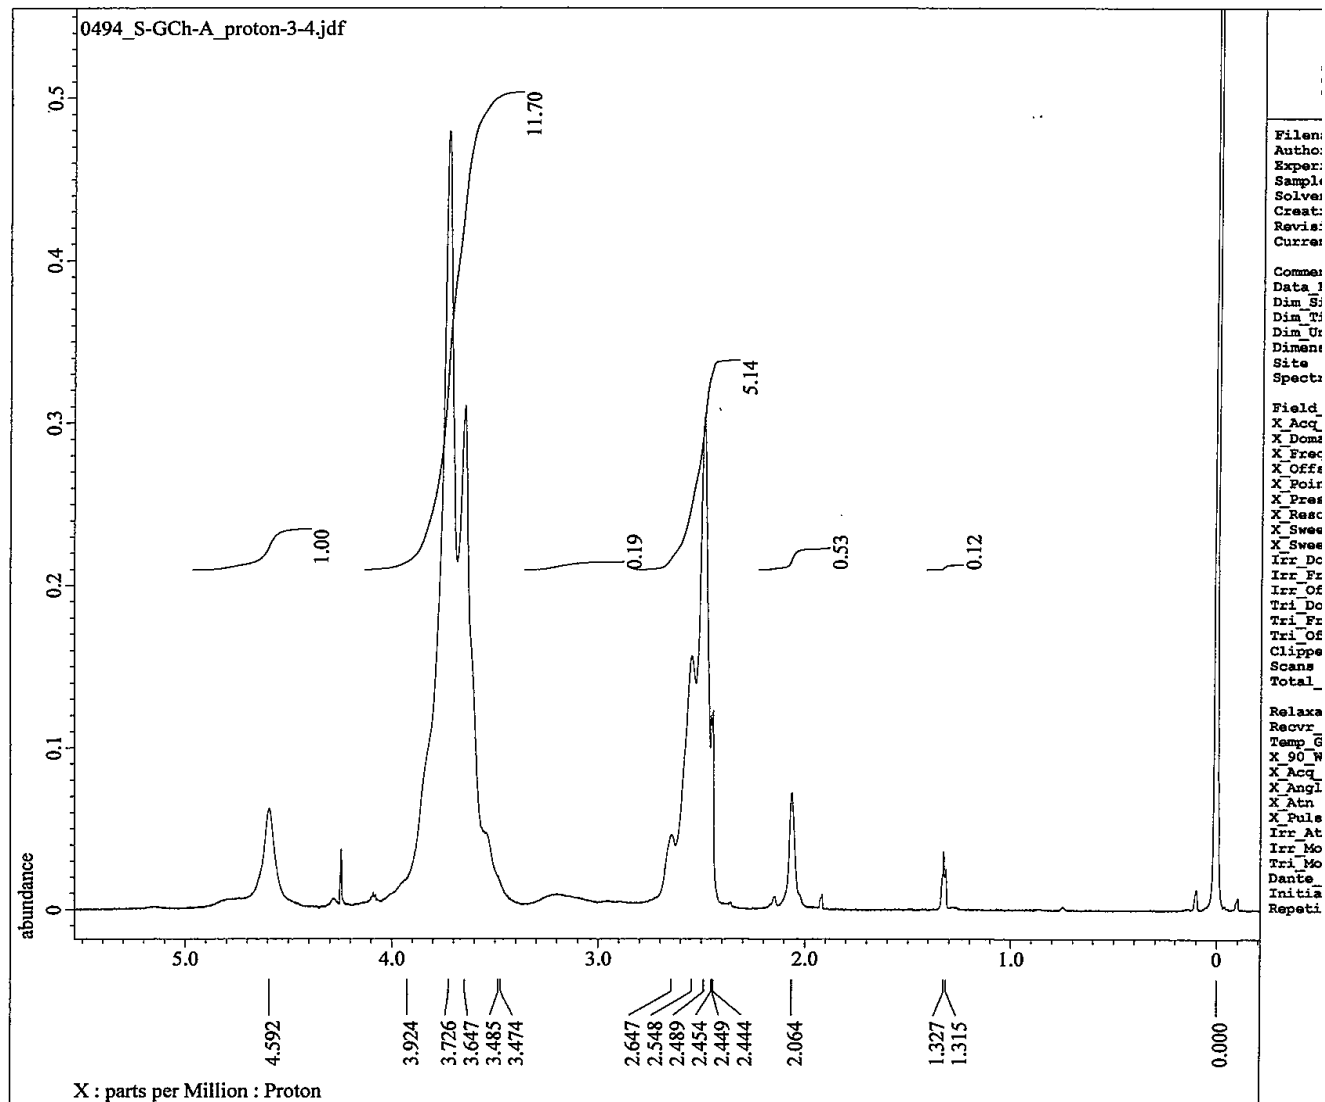

**Supplementary file 3. The  $^1\text{H}$ -NMR spectrum of S-GCh synthesized in the similar reaction.**

|     |  |          | cal      | obs         | normalize(mol) |  |    | mol ratio  |
|-----|--|----------|----------|-------------|----------------|--|----|------------|
| GCh |  | H1'      | <b>1</b> | <b>1.21</b> | <b>1</b>       |  |    |            |
|     |  | other H' | 6 + 4m   | 15.17       | 12.53719008    |  | m= | 1.63429752 |
|     |  | COCH3    | 3n       | 0.79        | 0.652892562    |  | n= | 0.21763085 |

|          |  |          | cal           | obs          | normalize    |  |              | mol ratio   |
|----------|--|----------|---------------|--------------|--------------|--|--------------|-------------|
| S-GCh-SP |  | H1'      | 1             | 1.85         | 0.564315252  |  |              |             |
|          |  | other H' | <b>6 + 4m</b> | <b>41.11</b> | <b>12.54</b> |  | m=           | 1.635       |
|          |  | COCH3    | 3n            | 1.5          | 0.457552907  |  | n=           | 0.15251764  |
|          |  | Suc      | 4x            | 10.9         | 3.324884456  |  | x=           | 0.83        |
|          |  | PD       | y             | 0.95         | 0.289783508  |  | y=           | 0.28        |
|          |  |          |               |              |              |  | <b>x-y =</b> | <b>0.55</b> |

0.28 mol PD part amount  
PD MW=360

**PD content 23.42116269(%, w/w)**

Succinylation degree

**Supplementary file 4. Determination of molar ratio of each part (m, n, x, y) and PD content calculated from the 1H-NMR spectra. The m value over 1.0 means glycol group is attached to the parts other C6' position. The PD content = 23.4 % (w/w).**

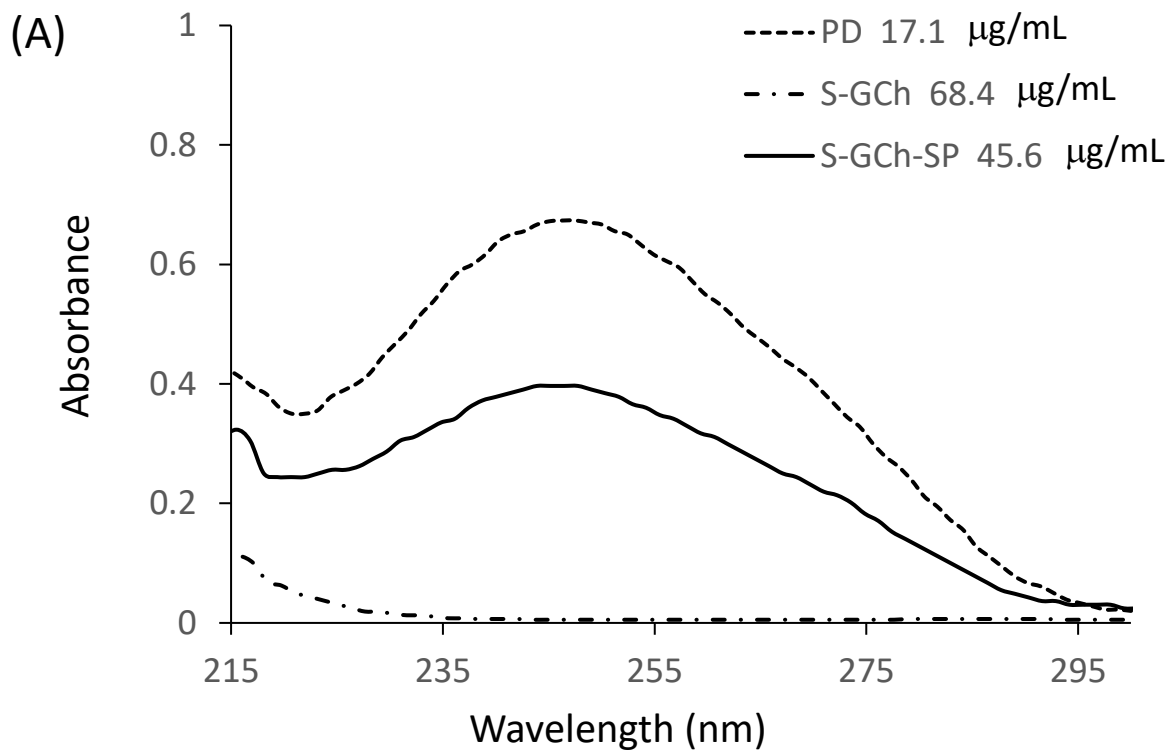

(B)

|                      | mg/mL    | conc (ug/mL) | abs(246) |
|----------------------|----------|--------------|----------|
| PD                   | 1.71/100 | 17.1         | 0.68     |
| S-GCh                | 1.71/25  | 68.4         | 0.01     |
| S-GCh-SP (NG(S))     | 1.14/25  | 45.6         | 0.39     |
| PD content = 20.9559 |          |              |          |

**Supplementary file 5. UV absorption profile of PD, S-GCh and S-GCh-SP (treated at 45 oC for 10 min) in 0.1 M NaOH (A), and PD content calculated from the UV absorption at 246 nm. The PD content = 21.0 % (w/w). The PD content was estimated to be 20.8 % (w/w) in triplicated measurements.**
